# Supplementary material for: Allosteric Modulation of GSK-3β as a New Therapeutic Approach in Limb Girdle Muscular Dystrophy R1 Calpain 3-Related
Source: MDPI journal article supplement (doi:10.3390/ijms22147367), 2021-07-08
Supplement: s1 [file s1]

**Table S1.** Used *TaqMan*<sup>®</sup> probes

| Gene and exon in which the probe binds | Probe code    |
|----------------------------------------|---------------|
| <i>CAPN3</i> Ex1-2                     | Hs00181057_m1 |
| <i>FOS</i> Ex1-2                       | Hs99999140_m1 |
| <i>ITGB1BP2</i> Ex4-5                  | Hs00183746_m1 |
| <i>ANOS1</i> Ex2-3                     | Hs01085107_m1 |
| <i>GAPDH</i> Ex2                       | Hs99999905_m1 |

**Table S2.** Used antibody list

| Primary Antibody                          | Manufacturer              | Reference |
|-------------------------------------------|---------------------------|-----------|
| GAPDH                                     | Cell Signaling Technology | #2118     |
| $\beta$ -catenin                          | Santa Cruz Biotechnology  | SC-7963   |
| GSK-3 $\beta$                             | Cell Signaling Technology | #9315     |
| Phospho-GSK-3 $\beta$ (Ser9)              | Cell Signaling Technology | #9323     |
| Active- $\beta$ -Catenin                  | Milipore                  | 05-665    |
| Akt                                       | Cell Signaling Technology | #9272     |
| Phospho-Akt (Ser473)                      | Cell Signaling Technology | #4060     |
| mTOR                                      | Cell Signaling Technology | #2983     |
| Phospho-mTOR (Ser2448) [Cells]            | Cell Signaling Technology | #2971     |
| Phospho-mTOR (Ser2448) [Muscle]           | Cell Signaling Technology | #5536     |
| Phospho-mTOR (Ser2481)                    | Cell Signaling Technology | #2974     |
| p70 S6 Kinase                             | Cell Signaling Technology | #2708     |
| Phospho-p70 S6 Kinase (Thr421/Ser424)     | Cell Signaling Technology | #9204     |
| Phospho-p70 S6 Kinase (Thr389) [Cells]    | Cell Signaling Technology | #9205     |
| Phospho-p70 S6 Kinase (Thr389) [Muscle]   | Cell Signaling Technology | #9234     |
| Phospho-S6 Ribosomal Protein (Ser235/236) | Cell Signaling Technology | #2211     |
| AMPK $\alpha$                             | Cell Signaling Technology | #2532     |
| Integrin $\beta$ 1D                       | Milipore                  | MAB1900   |
| Melusin                                   | Abcam                     | SC-133780 |
| Phospho-AMPK $\alpha$ (Thr172)            | Cell Signaling Technology | #2531     |
| Secondary Antibody                        | Manufacturer              | Reference |
| Anti-rabbit IgG, HRP-linked               | Cell Signaling Technology | #7074     |
| Anti-mouse IgG, HRP-linked                | DAKO                      | P0260     |

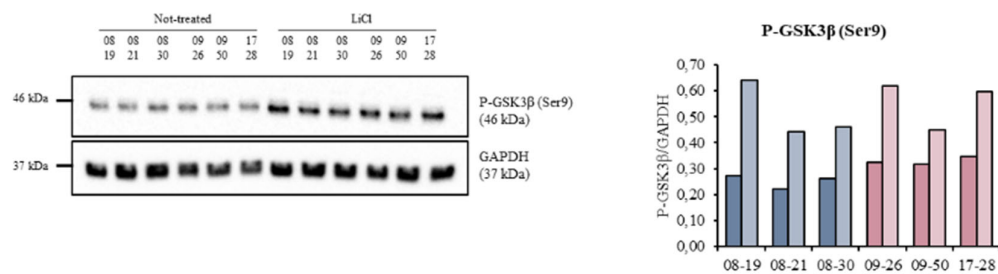

**Figure S1.** Análisis del efecto en fibroblastos con tratamiento con Li (P-GSK3β en Ser9)

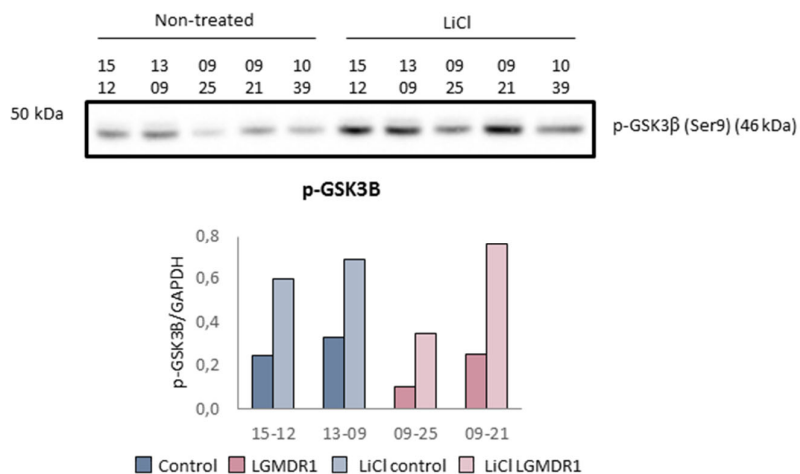

**Figure S2.** Análisis del efecto en CD56- con tratamiento con Li (P-GSK3β en Ser9)
